# Supplementary material for: Micro blood analysis technology (μBAT): multiplexed analysis of neutrophil phenotype and function from microliter whole blood samples
Source: Royal Society of Chemistry journal article supplement (doi:10.1039/d4lc00333k), 2024-01-01
Supplement: d4lc00333k1.pdf [file d4lc00333k1.pdf]

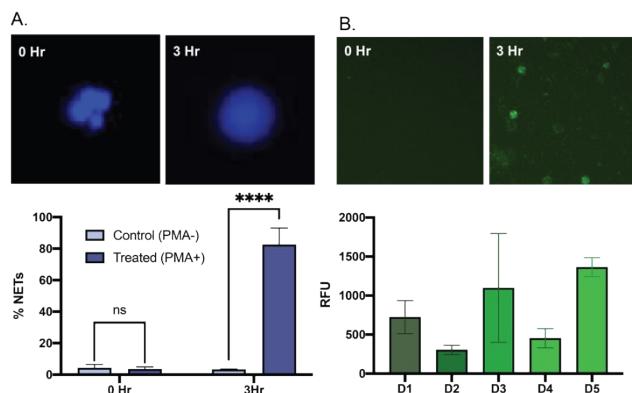

**Figure S1. Measuring NETosis and phagocytosis in  $\mu$ BAT.** A) Image showing the diffuse nuclear staining used to identify a neutrophil that has undergone NETosis. The percentage of cells that underwent NETosis after PMA treatment is quantified.  $p < 0.05$ . B) Representative image of cells that have phagocytosed pHrodo E.coli particles. Quantification of phagocytosis from 5 different donors. Each donor was tested in duplicate experiments.

Supplementary Table 1. Primers used for RT-PCR studies.

| Primer | Catalog number |
|--------|----------------|
| GAPDH  | Hs02786624_g1  |
| EF1A1  | HS01591985-g1  |
| RPLP0  | Hs00420895_g1  |
| CD45   | HS04189204-m1  |
| IL8    | HS0017463-m1   |
| IL6    | HS00174131-m1  |
| HGF    | HS00300159_m1  |
| IL1B   | MM00434228-m1  |
| CXCL11 | HS04187682-g1  |

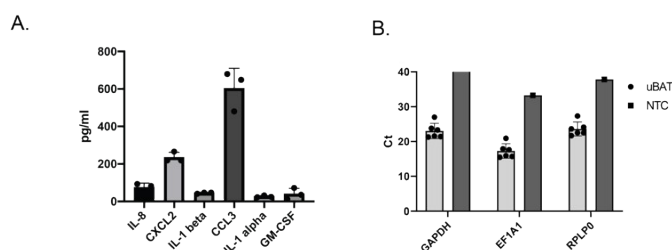

**Figure S2. Gene expression and cytokine analysis in  $\mu$ BAT.** A) Quantification of cytokines from supernatant removed from  $\mu$ BAT channels B) Gene expression analysis showing expression of housekeeping genes in  $\mu$ BAT compared to no template control (NTC)
